# Supplementary material for: Differential isoform expression of Allergin‐1 during acute and chronic inflammation
Source: PubMed Central journal article supplement (PMC9695092; doi:10.1002/iid3.739), 2022-11-25

**A**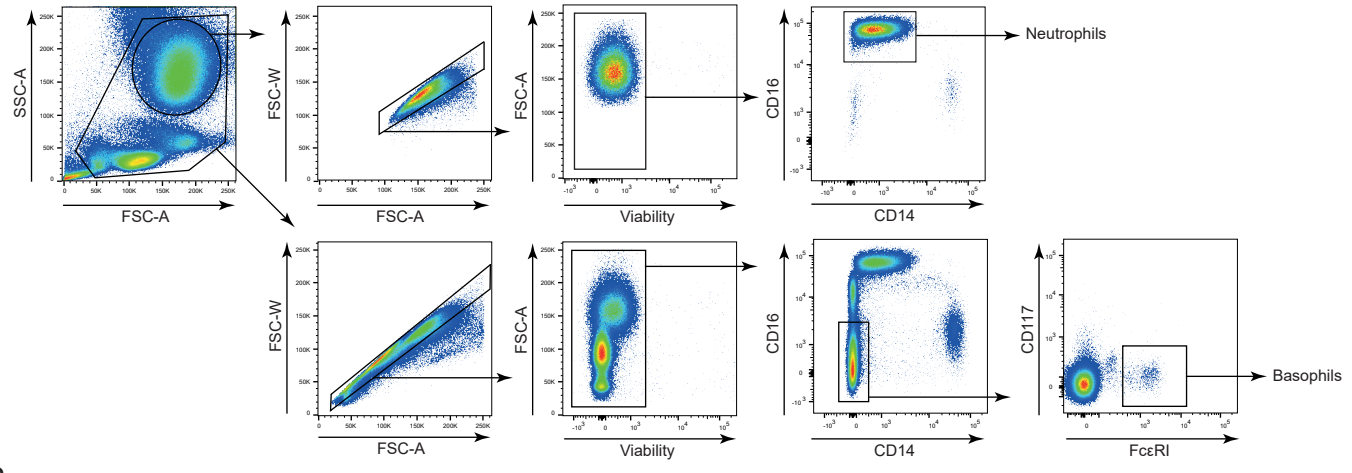**B**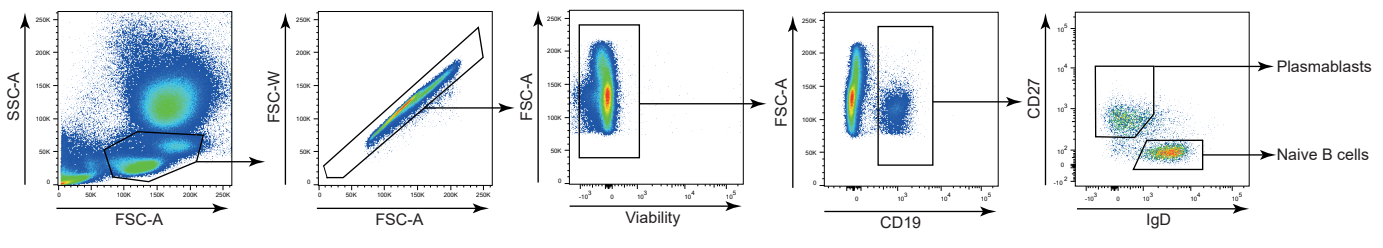**C**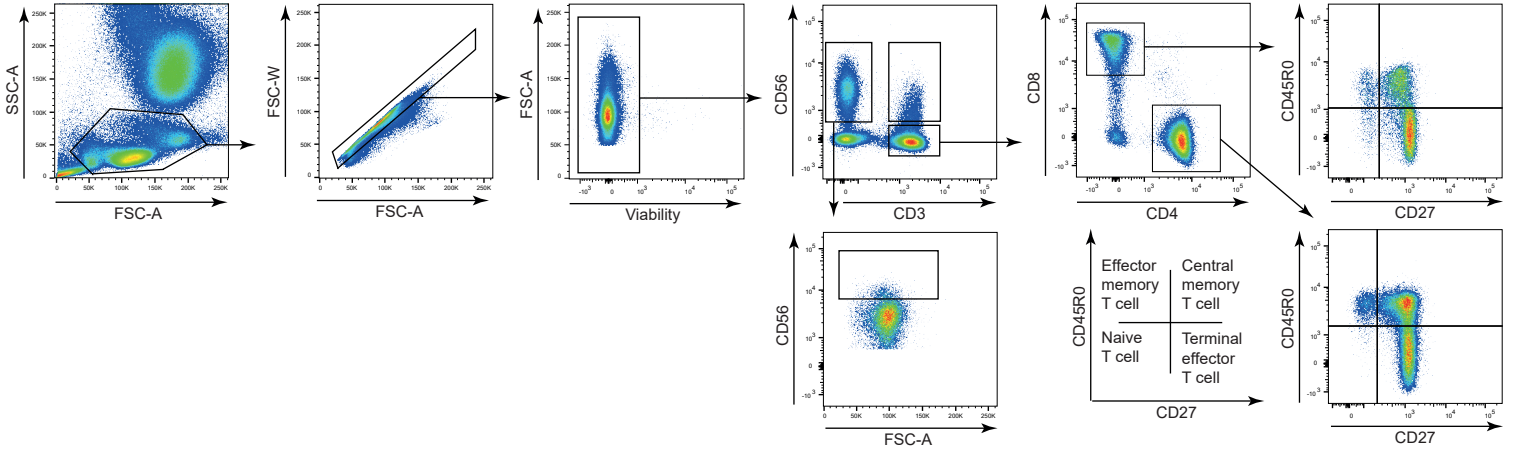**D**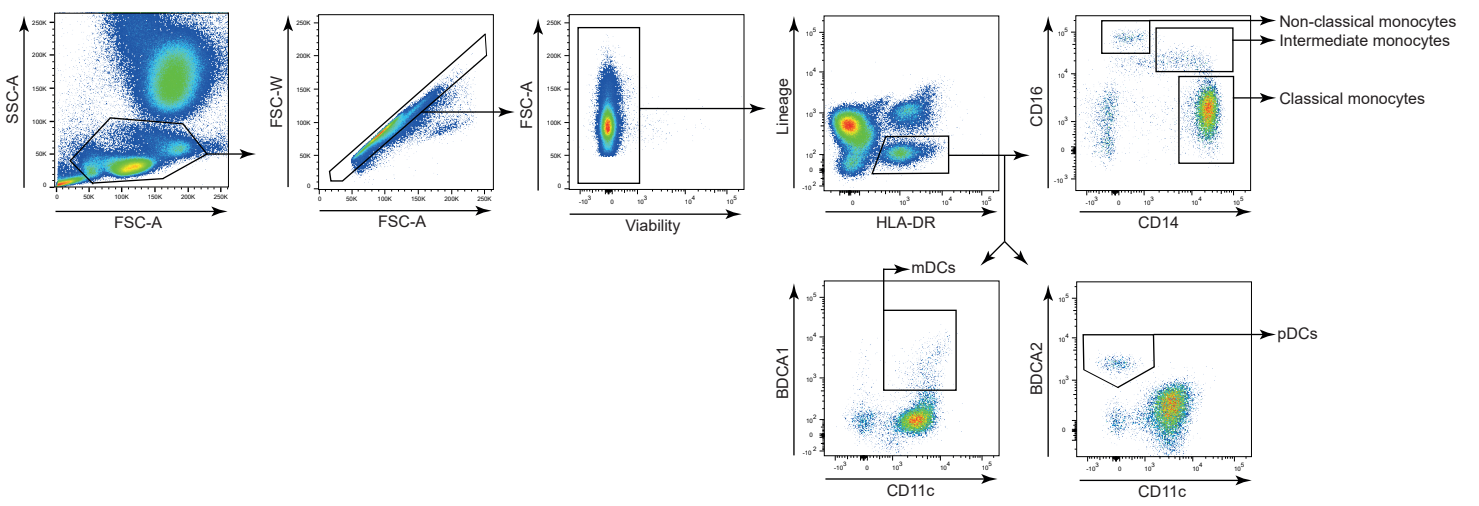

Supplement: IID3-10-e739-s001.pdf [file IID3-10-e739-s001.pdf]
