# Supplementary material for: Differential isoform expression of Allergin‐1 during acute and chronic inflammation
Source: PubMed Central journal article supplement (PMC9695092; doi:10.1002/iid3.739), 2022-11-25
Supplement: IID3-10-e739-s004.pdf [file IID3-10-e739-s004.pdf]

### SLE patients & healthy donors

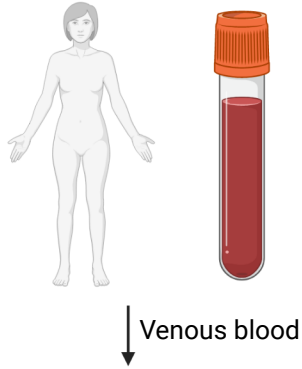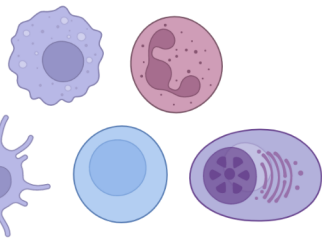

### Immunophenotyping Allergin-1 expression

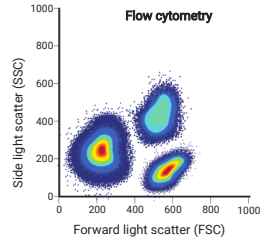

**Figure 1**  
**Figure 2**  
**Suppl. Fig. 2**

### RSV bronchiolitis

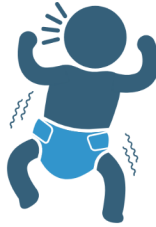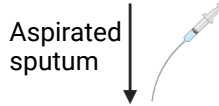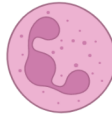

### Neutrophil Allergin-1 expression

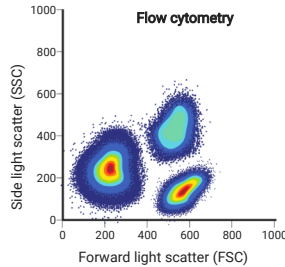

**Figure 3**  
**Suppl. Fig. 3**

### Experimental RSV infection

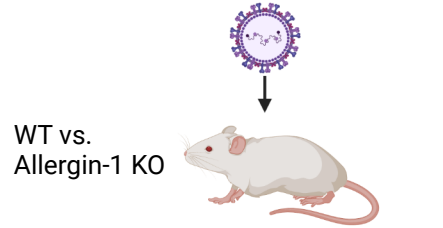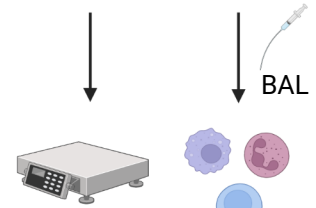

Body weight

Leukocyte  
airway influx

Haematocytometer  
Cell count

Morphological  
differentiation  
(PMN, L, Mono)

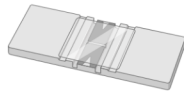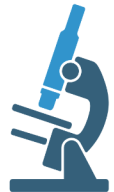

**Figure 4**
